# Supplementary material for: P2Y2 and Gq/G11 control blood pressure by mediating endothelial mechanotransduction
Source: JCI journal article supplement (doi:10.1172/jci81067), 2015-07-12
Supplement: sd1 [file 1]

## Supplementary Information (Ms Wang et al.)

### Supplementary Data

#### **Supplementary Figure 1. $G\alpha_q/G\alpha_{11}$ mediated effects in endothelial cells *in vitro*.**

The indicated cells were transfected with scrambled siRNA (control) or siRNA directed against  $G\alpha_q$  and  $G\alpha_{11}$  (A-D) or were incubated in the absence (-) or presence of 10  $\mu$ M PP2 or 500 nM Ki8751 (E). **(A)** Quantitative RT-PCR analysis of the efficiency of siRNA-mediated knock-down of  $G\alpha_q$  and  $G\alpha_{11}$  compared to control treated cells (control was set as 1) (n=3). **(B)** Fluo-4-loaded cells (n=27 (ionomycin control), n=19 (ionomycin  $G\alpha_{q/11}$ ), n=16 (thrombin control), n=18 (thrombin  $G\alpha_{q/11}$ ); 3 independent experiments) were exposed to 10  $\mu$ M ionomycin or 10 U/ml thrombin, and  $[Ca^{2+}]_i$  was determined as fluorescence intensity (RFU, relative fluorescence units). Bar diagram (B) shows area under the curve (AUC). Shown are means  $\pm$  s.e.m.; \*\*\*,  $P \leq 0.001$  (two-tailed Student's *t* test). **(C-E)** BAECs were exposed to low and high shear (3 and 35 dynes/cm<sup>2</sup>, respectively, C), to 1  $\mu$ M insulin (I) or 10  $\mu$ M carbachol (C) (D) or to fluid shear at 20 dynes/cm<sup>2</sup> (E) for the indicated time; KD, knock-down. Akt and eNOS activation was determined by Western blotting for phosphorylated Akt and eNOS. Knock-down of  $G\alpha_q/G\alpha_{11}$  was verified by anti- $G\alpha_q/G\alpha_{11}$  immunoblotting. Bar diagrams show the densitometric evaluation (n=3). **(F)** Expression of the indicated genes in HUVECs. Cells were treated with control siRNA or with siRNA directed against  $G\alpha_q/G\alpha_{11}$ , and the expression of the indicated genes was determined by qRT-PCR (for primer sequences, see below). Shown is the expression level in cells after knock-down of  $G\alpha_q/G\alpha_{11}$  divided by the expression level under control conditions. Shown in C-F are means  $\pm$  s.e.m.; \*,  $P \leq 0.05$ ; \*\*,  $P \leq 0.01$ ; \*\*\*,  $P \leq 0.001$  (two-way ANOVA and Bonferroni's *post hoc* test).

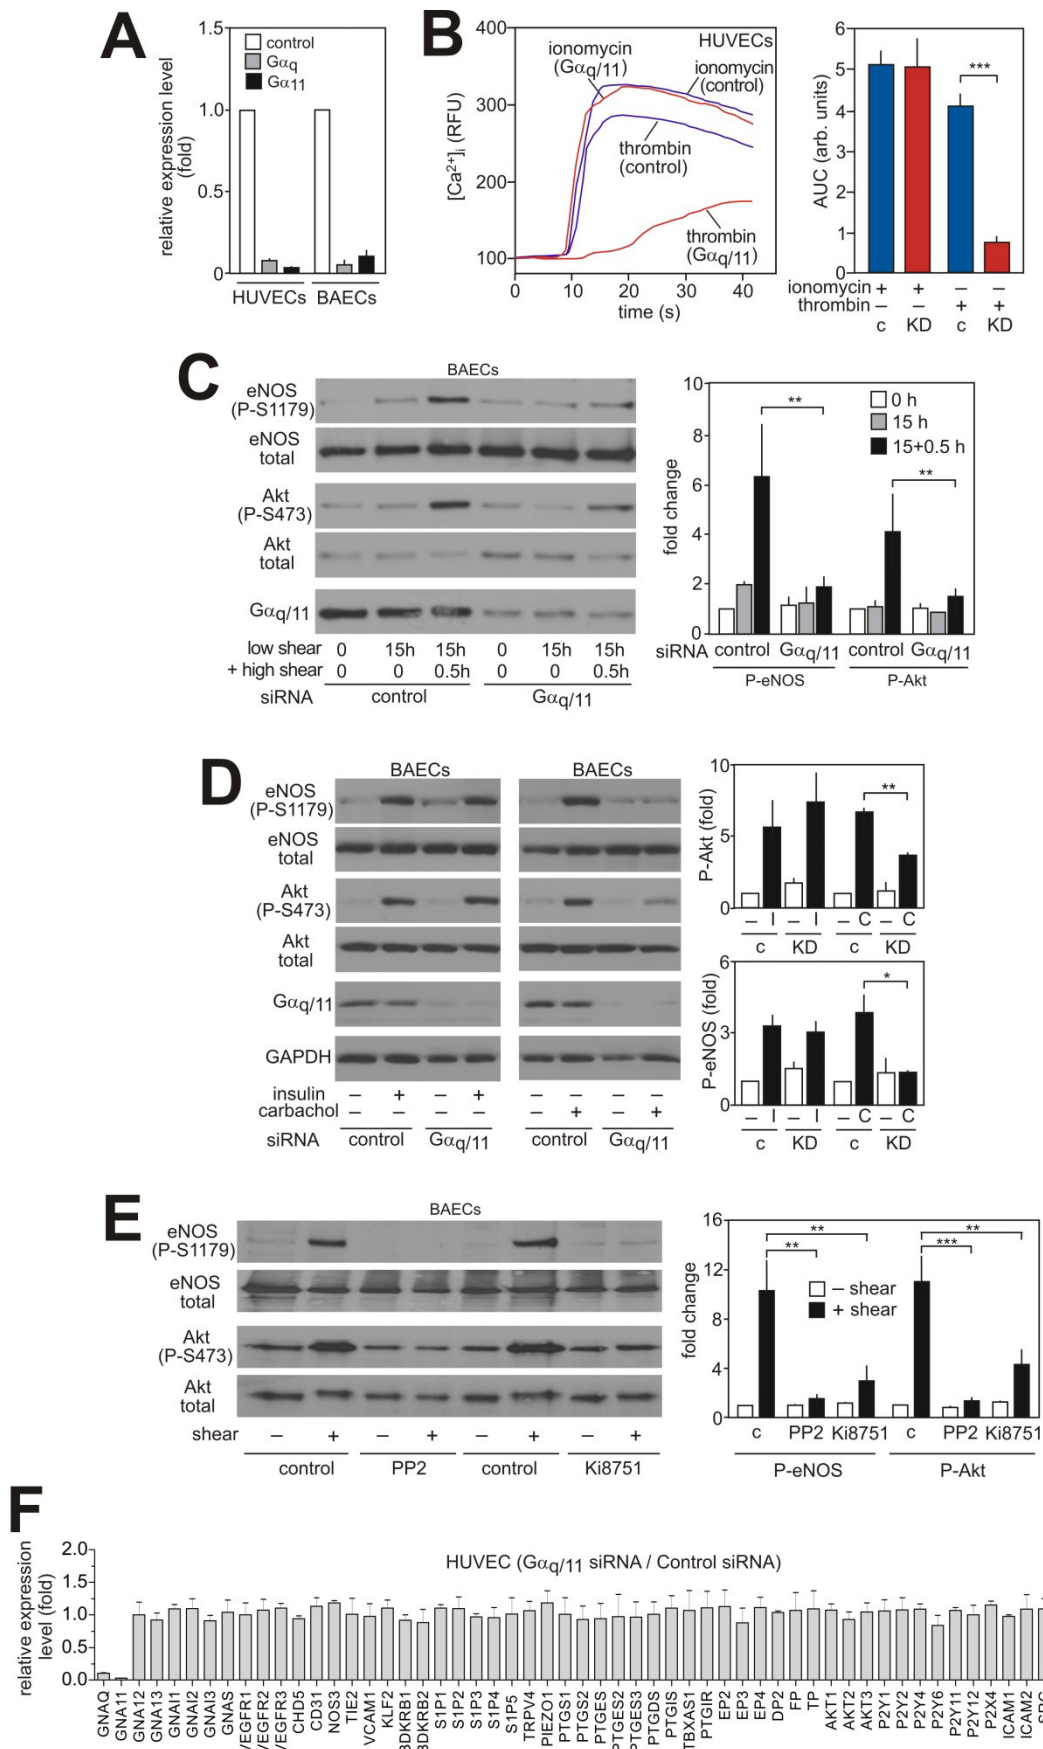

**Supplementary Figure 2. Effect of endothelium-specific  $G\alpha_q/G\alpha_{11}$  deficiency on remodeling of the common carotid artery**

(A) In wild-type (WT) and  $G\alpha_q/G\alpha_{11}$ -deficient mice (EC-q/11-KO), the left external artery was ligated, and two weeks later the left and right common carotid arteries were histologically analyzed. The diameter of the vessels was calculated by measuring the circumference of the vessels in histological sections. Bar diagrams show lumen diameter of the left and right common carotid artery 2 weeks after ligation of the external carotid artery (n=8). (B) The left common carotid artery of wild-type (WT) and endothelium-specific  $G\alpha_q/G\alpha_{11}$ -deficient mice (EC-q/11-KO) was ligated, and 4 weeks later, formation of a neointima in the common carotid artery was analyzed. Bar diagrams show the neointima area 4 weeks after the ligation of the common carotid artery in wild-type (WT; n=9) and EC-q/11-KO mice (n=8). Shown are means  $\pm$  s.e.m.; \*,  $P \leq 0.05$ ; \*\*,  $P \leq 0.01$ ; \*\*\*,  $P \leq 0.001$ ; n.s., not significant (two-tailed Student's *t*-test).

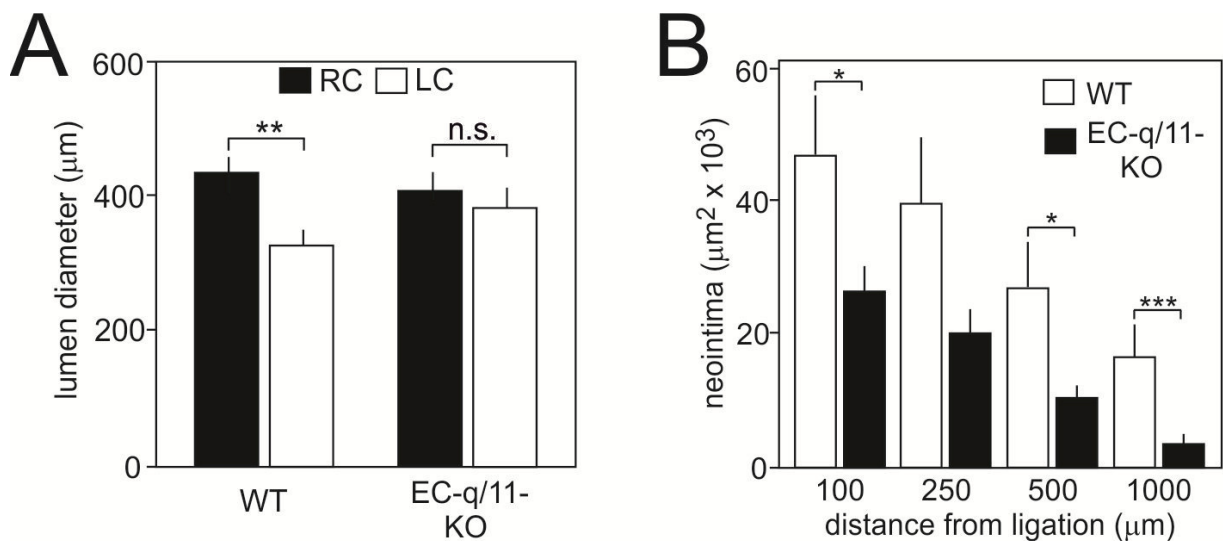

Suppl. Fig. 2

**Supplementary Figure 3. Identification of P2Y<sub>2</sub> as a receptor mediating fluid shear stress-induced Akt phosphorylation in HUVECs**

(A) Expression of non-olfactory GPCRs found both in HUVECs and human umbilical artery endothelial cells (HUAECs). Expression was determined by quantitative RT-PCR. (B) SiRNA screen to identify GPCRs mediating fluid shear stress-induced increases in Akt phosphorylation in HUVECs. Shown is the ratio of the fluid shear stress effect on Akt phosphorylation in cells transfected with an siRNA pool against a particular human GPCR and cells transfected with control siRNA. The plot shows the ranked average ratios of one out of two experiments performed with 42 siRNA pools directed against GPCRs found to be expressed in HUVECs and HUAECs (a). siRNAs directed against G $\alpha_q$  and G $\alpha_{11}$  served as a positive control. (C) HUVECs were transfected with scrambled (control) siRNA or siRNA directed against P2Y<sub>2</sub>, and cells were exposed to fluid shear (12 dynes/cm<sup>2</sup>) for the indicated time. Akt and eNOS activation was determined by Western blotting for phosphorylated Akt, eNOS and total Akt and eNOS (n=2).

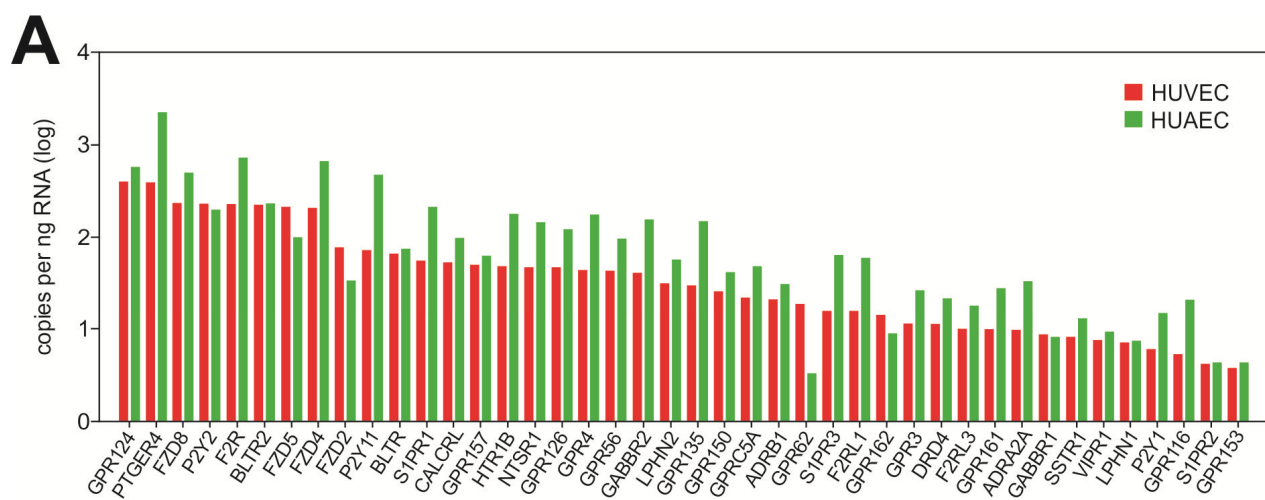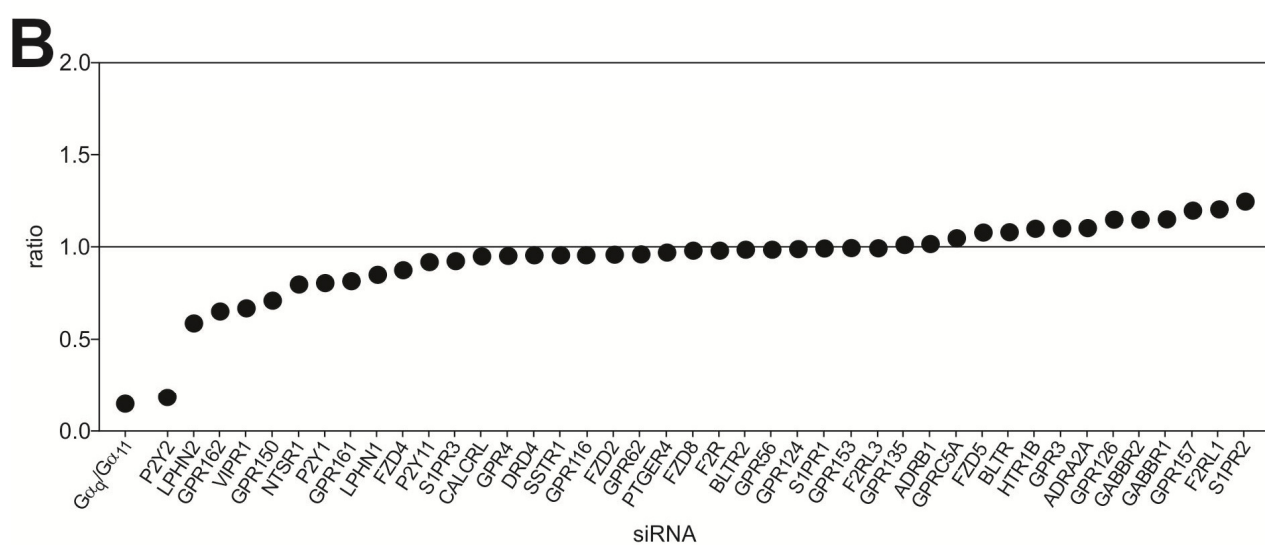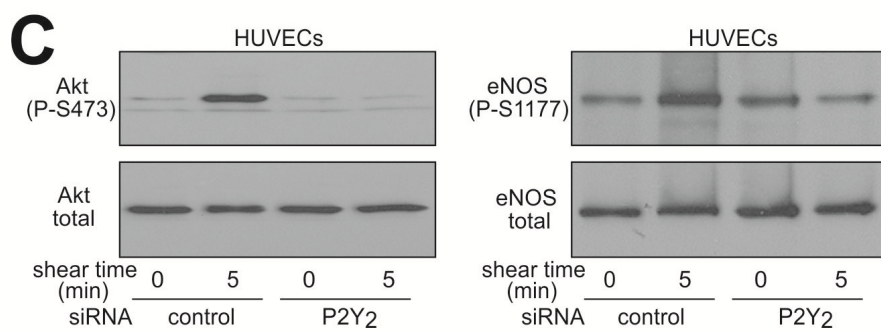

Suppl. Fig. 3

**Supplementary Figure 4. P2Y<sub>2</sub> mediates effects on endothelial cells *in vitro*.**

BAECs were transfected with scrambled siRNA (control) or siRNA directed against P2Y<sub>2</sub> or P2X<sub>4</sub>. **(A)** Fluo-4-loaded cells (n=22 (ATP control), n=17 (ATP P2Y<sub>2</sub>), n=18 (UTP control), n=23 (UTP P2Y<sub>2</sub>); 3 independent experiments) were exposed to 10 μM ATP or UTP, and [Ca<sup>2+</sup>]<sub>i</sub> was determined as fluorescence intensity (RFU, relative fluorescence units). Bar diagram shows area under the curve (AUC). Right panel in **(A)** shows efficiency of siRNA-mediated knock-down of P2Y<sub>2</sub> compared to control treated cells (control was set as 1) (n=3). Shown are means  $\pm$  s.e.m.; \*\*\*, P $\leq$ 0.001 (two-tailed Student's *t* test). **(B,C)** Cells were exposed to flow (20 dynes/cm<sup>2</sup>) for 5 min **(B)** or to 1 μM insulin (I) or 100 μM ATP **(A)** **(C)** for 1 min, and Akt and eNOS activation was determined by Western blotting for phosphorylated Akt and eNOS. Bar diagrams show the densitometric evaluation (n=3); KD, knock-down. **(D)** Expression of the indicated genes in HUVECs. Cells were treated with control siRNA or with siRNA directed against P2Y<sub>2</sub>, and the expression of the indicated genes was determined by qRT-PCR (for primer sequences, see below). Shown is the expression level in cells after knock-down of P2Y<sub>2</sub> divided by the expression level under control conditions. Shown are means  $\pm$  s.e.m.; \*, P $\leq$ 0.05; \*\*, P $\leq$ 0.01; \*\*\*, P $\leq$ 0.001 (two-way ANOVA and Bonferroni's *post hoc* test).

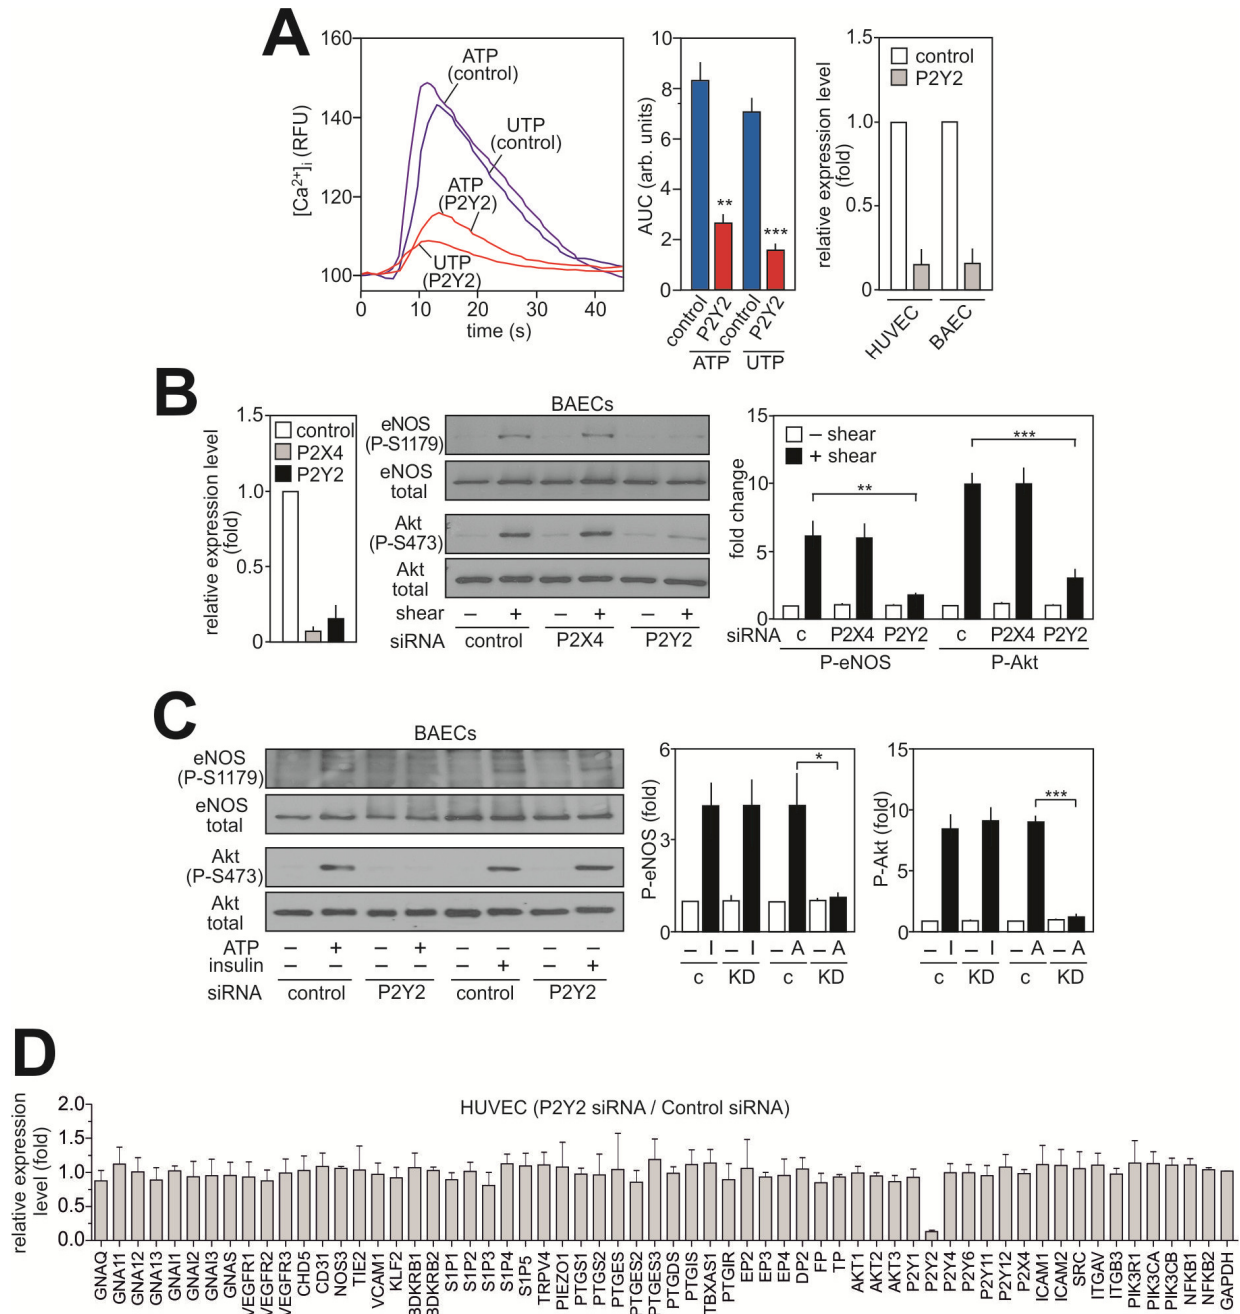

Suppl. Fig. 4

**Supplementary Figure 5. Generation of mice carrying a floxed allele of the gene encoding P2Y<sub>2</sub>**

(A) JM8A1.N3 mouse embryonic stem (ES) cells generated from the strain C57BL/6N carrying the shown targeted allele of the gene encoding P2Y<sub>2</sub> (*P2ry2*) were obtained from EUCOMM (ES cell clone number: HEPD0557 7 B07). ES cells were used to generate chimeric mice, and germ-line transmission was verified after crossing high-percentage chimeras with a Flp deleter mouse line<sup>1</sup>. Mice carrying the indicated floxed allele were then used to generate inducible endothelium-specific P2Y<sub>2</sub>-deficient mice (Tie2-CreER<sup>T2</sup>; *P2ry2*<sup>flox/flox</sup>). Shown are exon 2 and 3 of the *P2ry2* gene (E2 and E3) with the coding region in exon 3 shaded. Blue arrows indicate position of primers used to verify the alleles and to genotype mice. (B) Verification of ES cell clone HEPD0557 7 B07. (C) Verification of Flp-mediated recombination. (D) Genotyping of mice without or with one or two floxed P2Y<sub>2</sub> alleles. (E) Expression of P2Y<sub>2</sub> in endothelial cells isolated from skeletal muscle derived from wild-type and induced EC-P2Y<sub>2</sub>-KO mice as analyzed by RT-PCR. Skeletal muscle was minced into small pieces and digested with collagenase II, elastase, dispase and DNase. Endothelial cells were isolated using CD31-labelled dynabeads and further purified by CD144-PE labelled FACS sorting. RNA was prepared from sorted cells using Qiagen micro kit, and cDNA was preamplified using Nugen Pico WTA kit for expression analysis by RT-PCR.



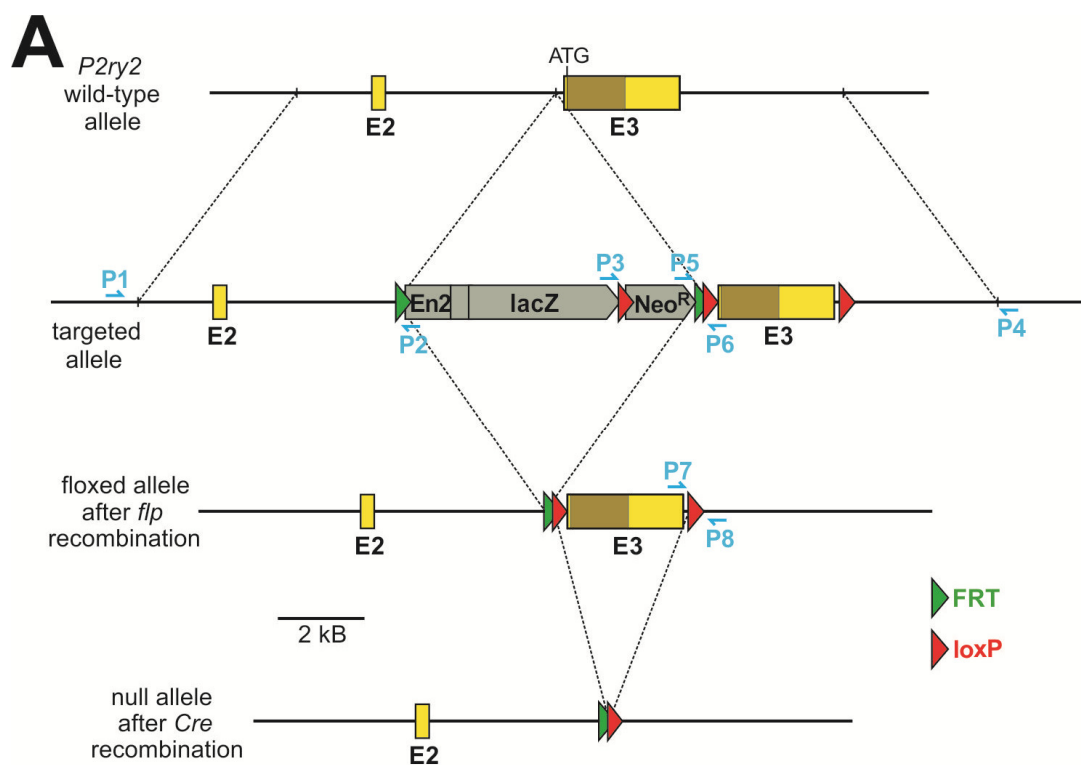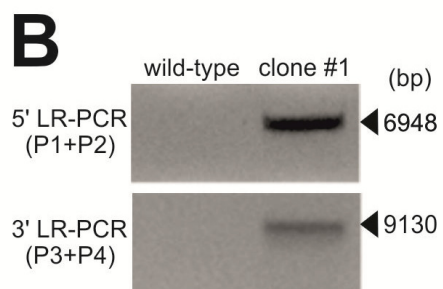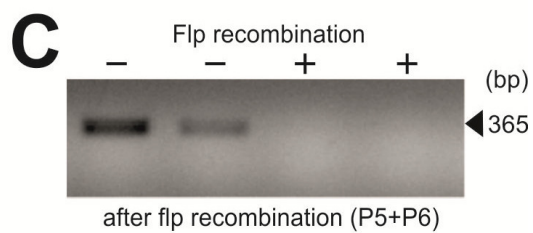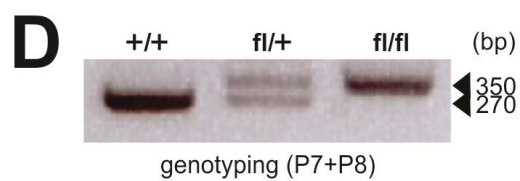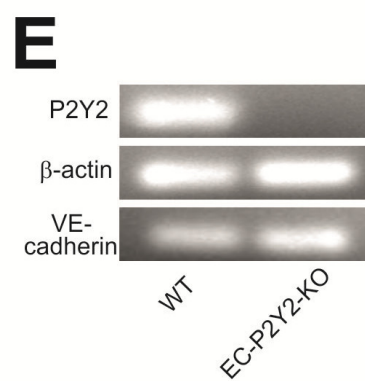

Suppl. Fig. 5

## References (Supplementary Data)

1. Rodriguez, C.I., *et al.* High-efficiency deleter mice show that FLPe is an alternative to Cre-loxP. *Nat. Genet.* **25**, 139-140 (2000).

### qPCR primer sequences (Human gene/Forward primer/Reverse primer/Probe; s. Suppl. Figs. 1 and 4)

GNAQ: gactactcccagaatgatggac / gggtcagggtccacgaacatc/#27  
 GNA11: gcatccaggaatgctacgac / ggtaacgctcggtcaggtag/#53  
 GNA12: gcgagttcgaccagaagg / catcaacaagaacccttgagc/#67  
 GNA13: tcgggaaaagacctatgtgaa / caaccagcaccctcatacct/#3  
 GNAI1: aagtacaattgtgaagcagatgaaa / tgggttactgttagaccactgctt/#35  
 GNAI2: ctcaacgactcagctgccta / tgctgtgtggggatgtagtc/#1  
 GNAI3: tgggacggctaaagattgac / ataattgccgggcatcatc/#60  
 GNAS: agagacccccagttgaggag / taccgccgagagggtacttt/#12  
 VEGFR1: caggaatgtatacacaggggaag / ttttgttcagtgctcacc/#65  
 VEGFR2: gctcaagacaggaagaccaag / ggtgccacacgctctagg/#27  
 VEGFR3: actgcaagaacgtgcatctg / catagtggccctcgtgct/#10  
 CDH5: acaaggacactggcgaaaac / cgcatgaactttgatggtga/#12  
 PECAM1: ggtggatgagggtccagatttc / cagcacaatgtcctctccag/#77  
 ENOS: ccgacgctacgaggagtg / ctgctccagcacctccag/#43  
 TIE2: gcaacttgacttcggtgcta / tgttgactctagctcggacca/#32  
 VCAM1: agttgctgatgtataccatttga / aattcctgactcttcatgagatgat/#19  
 KLF2: cgtgctggacttcatcctg / ggggtcggggtaatagaacg/#42  
 BDKRB1: agaccacagcgtgatcc / caggaaggcaaagaagtgtg/#3  
 BDKRB2: tcaccaacatgctcctgaat / cgtgcagaagggtgatgacac/#4  
 S1P1: ccgcctcttctgctaac / gcagttccagcccagatag/#3  
 S1P2: ccactcggcaatgtacctgt / acgcctgccagtagatcg/#61  
 S1P3: ctctgatcgggatgtgc / cagtcaggagattgtgcag/#26  
 S1P4: gcgctacggcttcatcg / ctggagcagcgggtcaaag/#3  
 S1P5: gagtggctcccagcagtc / gctgaagctcccacatcaagg/#27  
 TRPV4: atgctgagcagcaccaagta / aatgagcatggtgaggagca/#18  
 PIEZO1: cgtcttctgaggagcagatg / gcccttgacgggtgcatac/#41  
 PTGS1: tccatgttggtggactatgg / cagcaatctggcgagagaa/#81  
 PTGS2: cctactggaagccaagcact / acagccctcacggtattgc/#22  
 PTGES: gatgcacttctggtcttcc / taggtcacggagcggatg/#60  
 PTGES2: ctgctaccacgcagagc / ggctccccttacgagctg/#70

PTGES3: atgtatttaccatttactggaatgga / ttctgtgacattacagcaagc/#6  
 PTGDS: cacacactgtggatgggact / ctggaagtgggctgcac /#3  
 PTGIS: aaaagtcgcctgtggaagc / aactctccagccatttgctc/#20  
 TBXAS1: atcttctcatcgctggcta / gccagtaggtagggtggcaaa/#9  
 PTGIR: tcttcatccttttccgcaag / acaggcagcagaccaga/#11  
 EP1: cgctatgagctgcagtacc / agaggccagcaagcagtg/#28  
 EP2: tgcacctacttgccttgc / cgaagagcatgagcatcgt/#41  
 EP3: aaccttttcttgcctctgc / ggttgcaggaaaaggtgact/#45  
 EP4: gtccaacgtgctctttgc / accaggtgtctgggtactgc/#44  
 DP1: tctaccgacggcacatcac / aaaggtagcgcgcagaaag/#7  
 DP2: gcccttctcacctacttctg / ggaggagtgcagttgcag/#24  
 FP: catcaaagactgggaagatagatt / acaatgaaacaccaagggcta/#45  
 TP: cccctgggtgtatatactgtt / gcgctctgtccacttctac/#45  
 AKT1: cccttctacaaccaggacca / agccctgaaagcaaggact /#25  
 AKT2: gtcgccaacagcctcaag / cacttccatctcctcagtcgt/#57  
 AKT3: attgtagtccaactcacaattga / tgggtttagaggcatccat/#55  
 P2Y1: gccatctggatgttctgtt / ggccagagccaaattgaac/#1  
 P2Y2: actgctaaagccagcctacg / tagtagaggggtcgggtgac/#4  
 P2Y4: catcaccgacaccatttact / ttcagtactcggcagtcagc/#64  
 P2Y6: cctatggcatggctctcact / aggccaggagacagtagcag/#4  
 P2Y11: ctggccgcctacctctatc / cagcaggttgcaggtgaag/#1  
 P2Y12: catgattctgacttttccattca / tgacacacaaaagttctcagtgg/#48  
 P2X4: agcccatcaaagaacagag / tctctggggtgatgtggtg/#63  
 PIEZO2: tcatgaaggtgctggtaatc / ccgcagacgtagatccaatac/#49  
 ICAM1: actggacgtggccagaaa / acttgagctcgggcaatg/#3  
 ICAM2: aggtcatcctgacactgcaa / tgcactcaatggtgaaggac/#76  
 SRC: agcctggcacgatgtctc / gcctcagcttcttcatgacc/#4  
 ITGAV: caagcaaaaggagcaattc / tcatgttcttggagtgacttg/#62  
 ITGB3: tagaggacaggcccctca / tctctggggactgactga/#24  
 PIK3R1: gatgaagatttgcctcatca / caggtttcagctttgttctg/#38  
 PIK3CA: aaaggcggctgaaaggt / cttgtctttgagccactgatgt/#5  
 PIK3CB: tcaactgaatgccgtgaag / tcccgtaagcactctgttt/#12  
 NFkB1: cgcaaacctgggtatacttcat / acacgcctctgtcattcgt /#47  
 NFkB2: gcagacgagtggtgagc / gtctccatgccgatccag/#84
